# Supplementary material for: Mortality and morbidity of low-grade red blood cell transfusions in septic patients: a propensity score-matched observational study of a liberal transfusion strategy
Source: Springer Nature journal article supplement (doi:10.1186/s13613-020-00727-y), 2020-08-08

### Inclusions per year

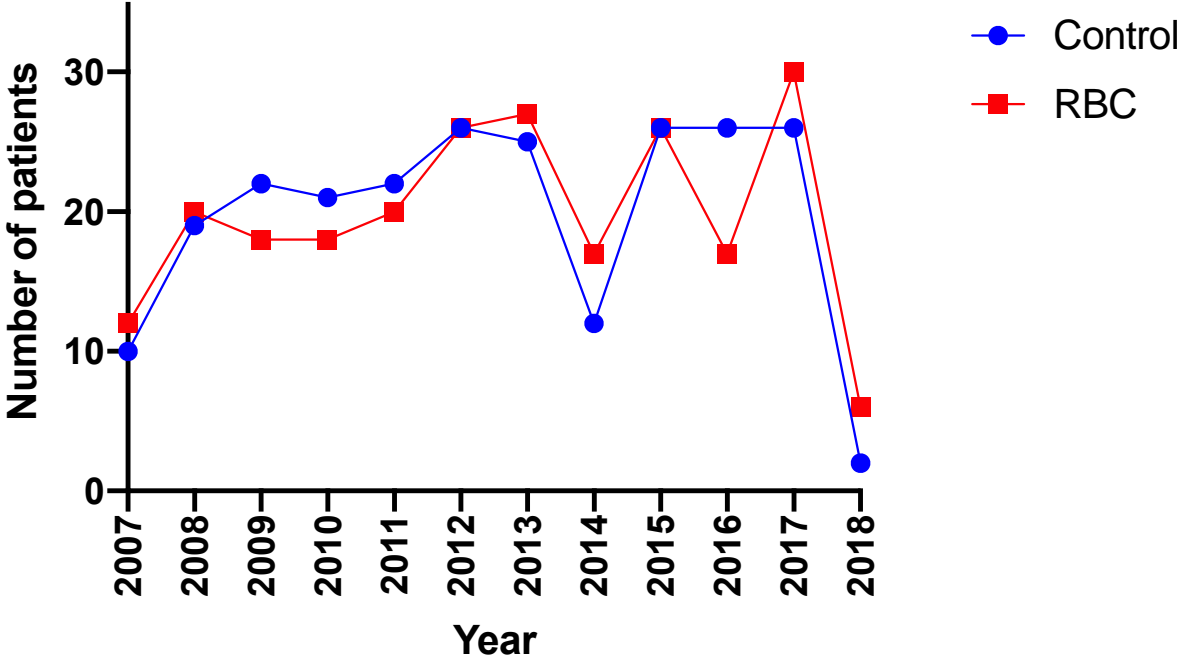

Supplement: MOESM1 [file 18259420]
